# Supplementary material
Source: bioRxiv or medRxiv preprint supplement (http://biorxiv.org/highwire/filestream/23627/field_highwire_adjunct_files/0/066563-1.pdf)
Supplement: Supplementary file [file 066563-1.pdf]

1 Supporting Information for

2 **Capture of *Vibrio cholerae* by charged polymers inhibits pathogenicity by**  
3 **inducing a sessile lifestyle**

4  
5 Nicolas Perez-Soto<sup>1,2</sup>, Lauren Moule<sup>1,2</sup>, Daniel N. Crisan<sup>2,3</sup>, Ignacio Insua<sup>2,3</sup>, Leanne M. Taylor-  
6 Smith<sup>1,2</sup>, Kerstin Voelz<sup>1,2</sup>, Francisco Fernandez-Trillo<sup>2,3,\*</sup>, Anne Marie Krachler<sup>1,2,\*</sup>

7  
8  
9 This file contains:

10 Supporting Figures S1-S7

11 Supporting Tables S1 and S2

12 Supporting Materials and Methods

13 Supporting References

14

15

16

17

18

19

20

21

22

23

## 24 SUPPORTING FIGURES

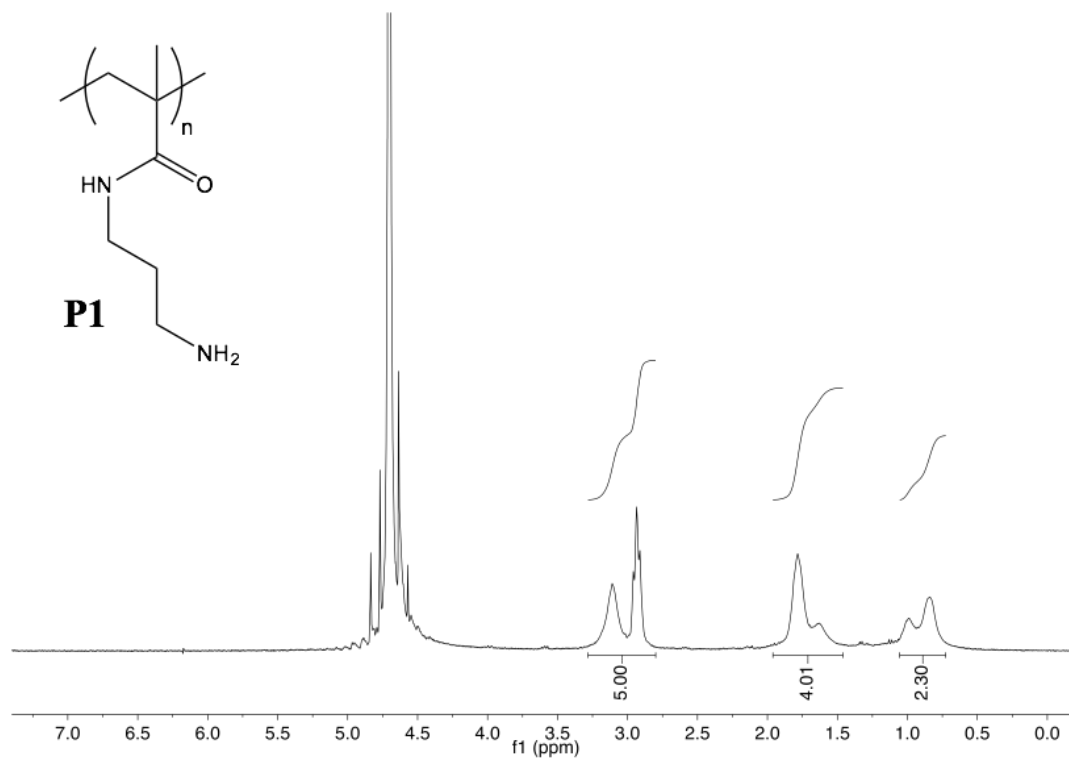

25

26 **Figure S1** | <sup>1</sup>H-NMR (300 MHz, D<sub>2</sub>O) spectrum of **P1**.

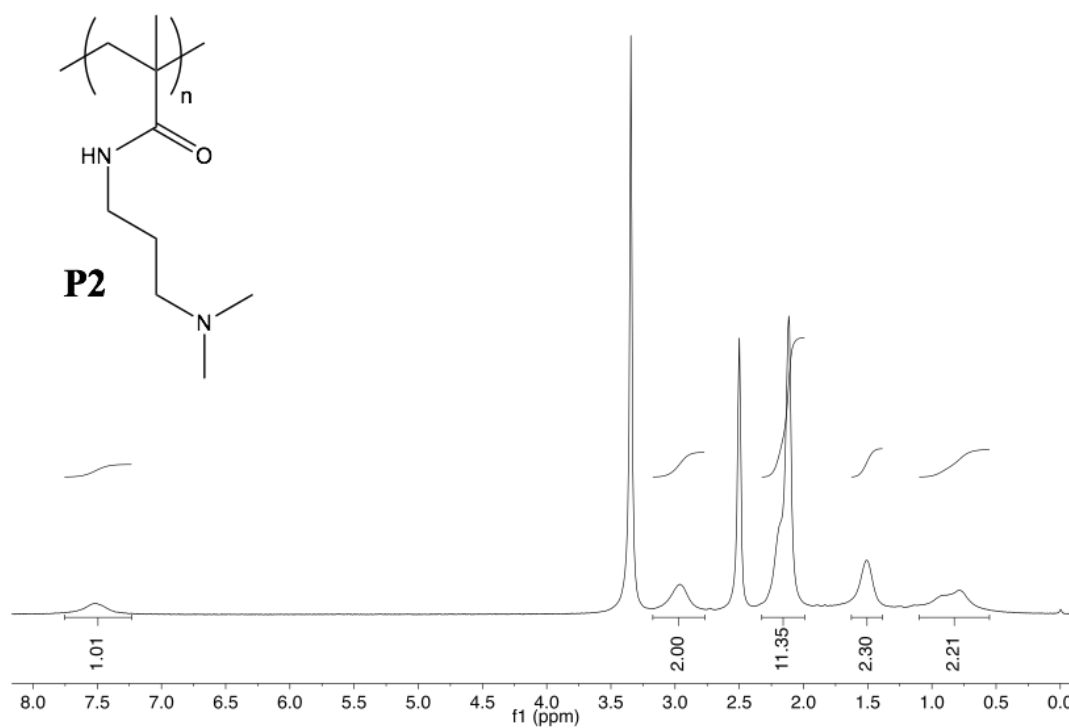

27

28 **Figure S2|** <sup>1</sup>H-NMR (300 MHz, DMSO-d<sub>6</sub>) spectrum of **P2**.

29

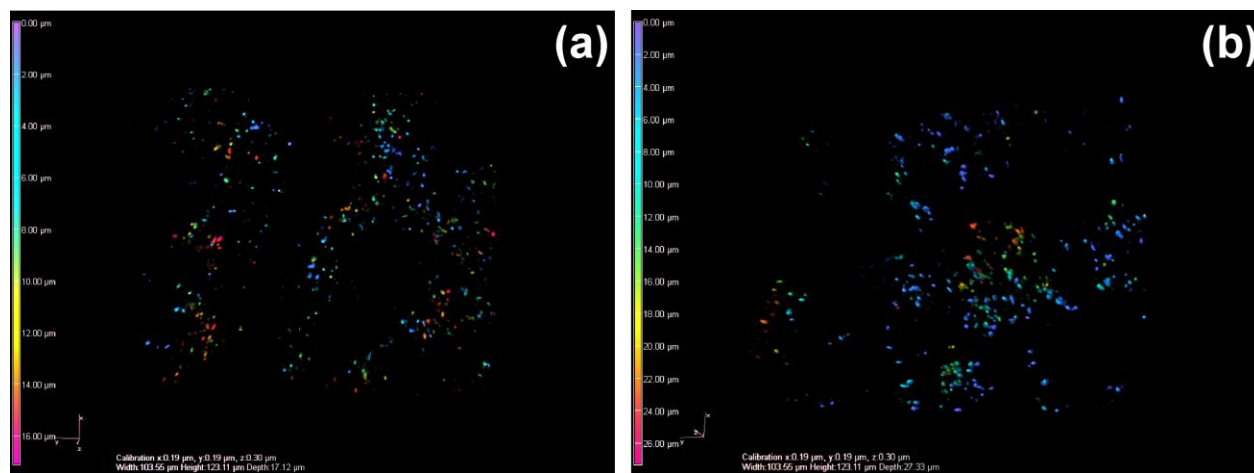

30

31 **Figure S3|** Polymers induce rapid formation of three-dimensional bacterial clusters. GFP-*V. cholerae* were  
 32 incubated with 0.5 mg/mL of P1 (a) or P2 (b) for 15 minutes, and z-stack images were collected using a spinning  
 33 disc confocal microscope. Maximum intensity projections are shown, with color-coded Z-depth. Total depth of the  
 34 clusters shown here are 17 and 27 μm, respectively.

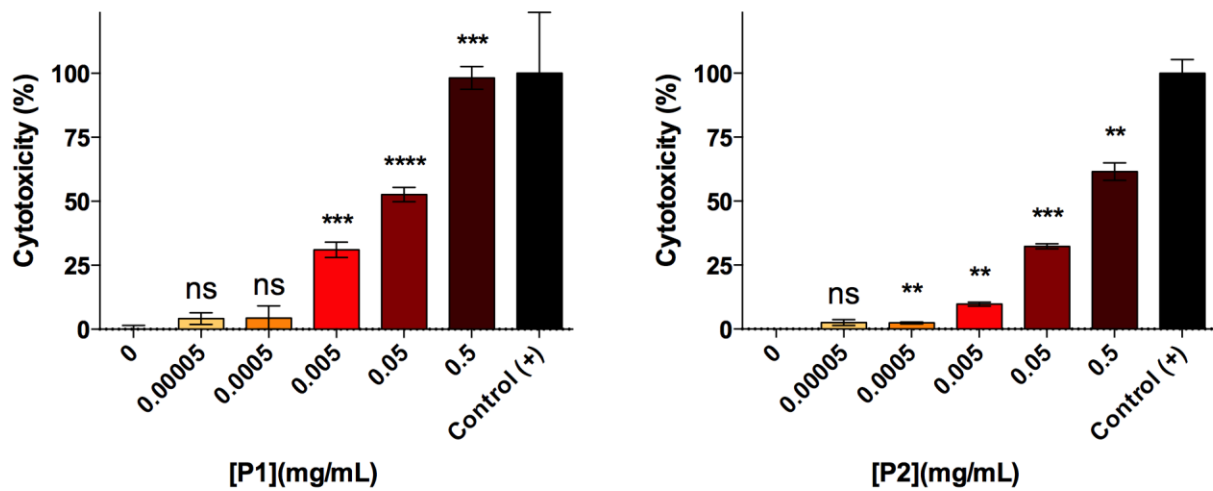

35

36 **Figure S4| Effect of polymers on membrane integrity of cultured epithelial cells.** Solutions of polymers in  
 37 DMEM at concentrations as indicated, were incubated with cultured Caco-2 intestinal epithelial cells for 7 hrs.  
 38 Cytotoxic effect on host cells was quantified by measuring the amount of lactate dehydrogenase (LDH) released into  
 39 the culture medium. Results were normalized to untreated Caco-2 cells (0%) and cells lysed with Triton X-100  
 40 (100%). Results are means  $\pm$  s.e.m. of three independent experiments. Analysis of variance (ANOVA), followed by  
 41 Tukey's post hoc test, was used to test for significance. Statistical significance was defined as  $p < 0.01$  (\*\*),  $p < 0.001$   
 42 (\*\*\*), or  $p < 0.0001$  (\*\*\*\*).

43

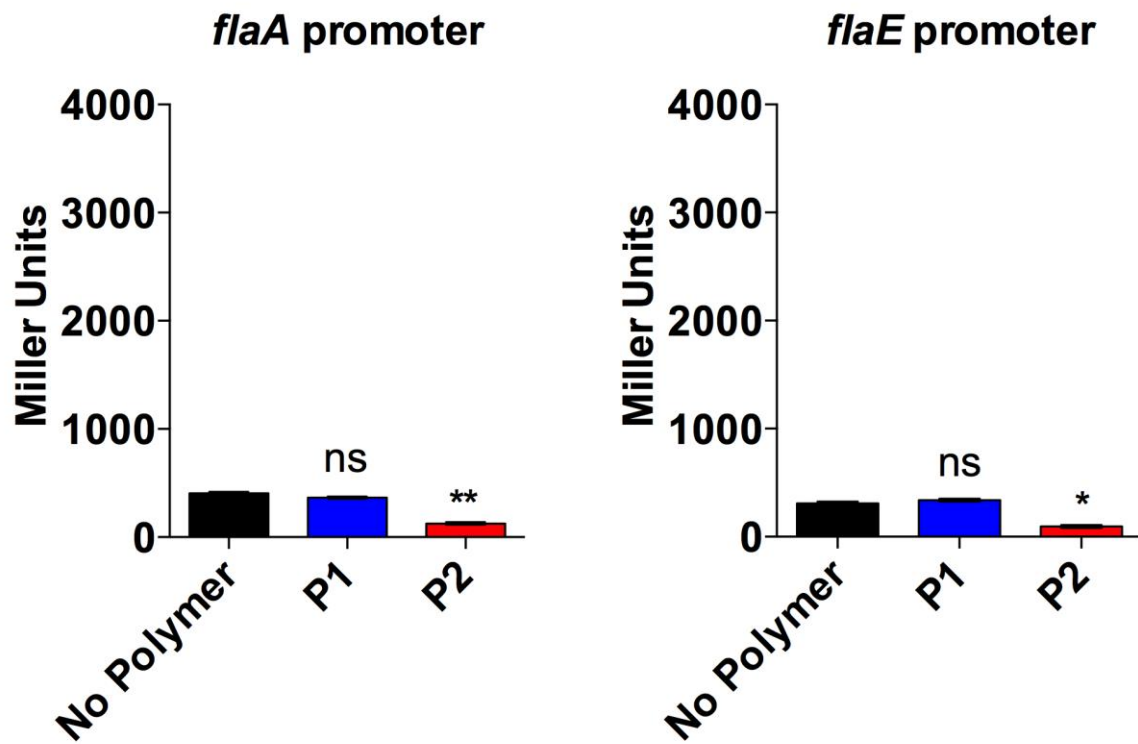

44

45 **Figure S5| Effect of bacterial clustering on transcriptional regulation of flagella-driven motility.** Promoter  
46 activities of *flaA-lacZ* and *flaE-lacZ* fusions in *V. cholerae* were measured following infection of Caco-2 cells with  
47 *V. cholerae* reporter strains at an MOI of 10 for 7 hours at 37 °C in the absence (black) or in the absence (black) or  
48 presence of 0.05 mg/mL P1 (blue) or 0.5 mg/mL P2 (red) .

---

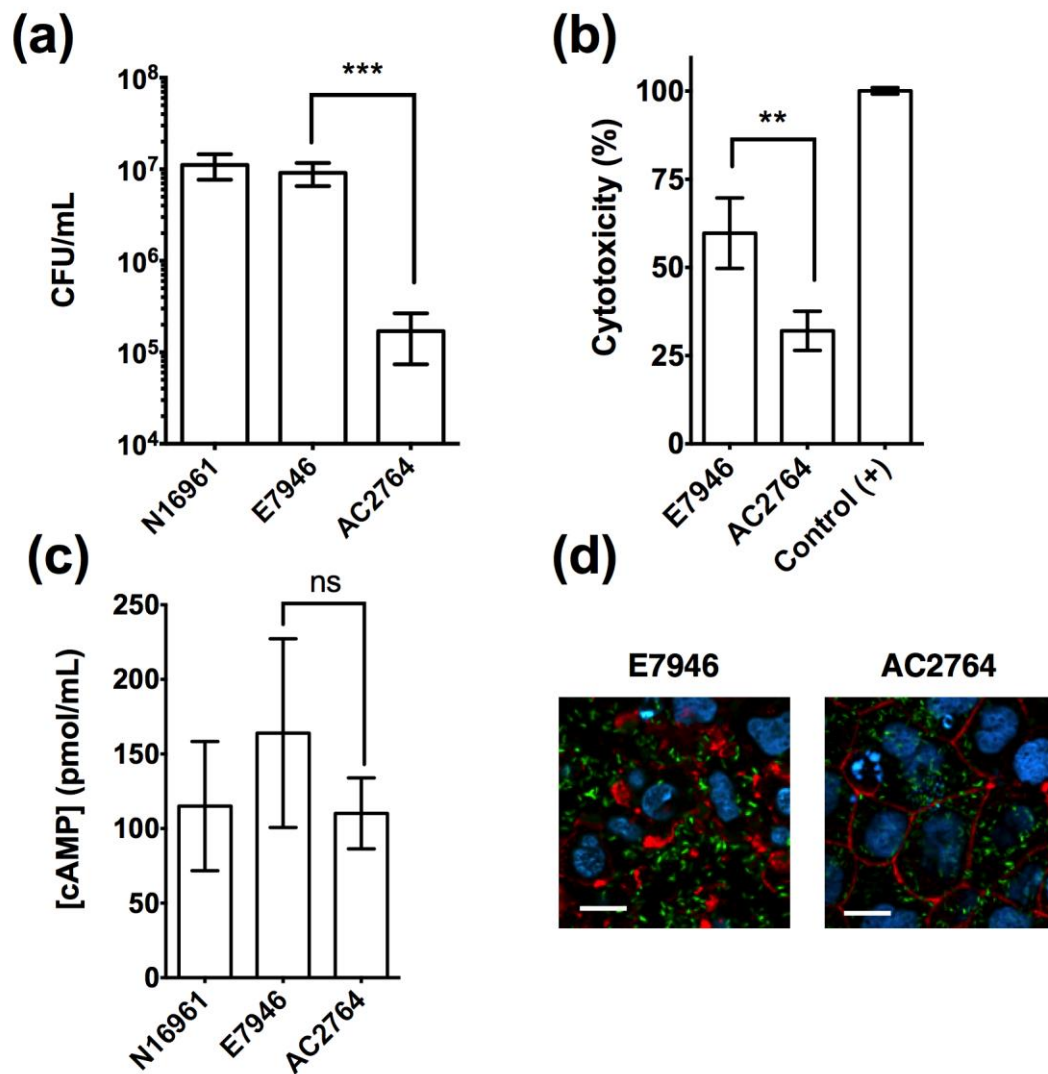

49

50

51 **Figure S6| Effect of *tcpA* deletion on bacterial attachment, cytotoxicity and cAMP release in a Caco-2 infection**  
 52 **model.** *V. cholerae* E7946 and E7946  $\Delta$ *tcpA* cultures were adjusted to an MOI of 10, and used to infect cultured  
 53 Caco-2 intestinal epithelial cells for 7 hrs. Following the infection, (a) bacteria attached to Caco-2 cells were  
 54 quantified by dilution plating, following washing and lysis of Caco-2 cells. (b) Cytotoxic effect on host cells was  
 55 quantified by measuring the amount of lactate dehydrogenase (LDH) released into the culture medium. Results were  
 56 normalized to untreated Caco-2 cells (0%) and cells lysed with Triton X-100 (100%). (c) Levels of cAMP production  
 57 in Caco-2 cells were measured by ELISA. Results in a-c are means  $\pm$  s.e.m. of three independent experiments.  
 58 Analysis of variance (ANOVA), followed by Tukey's post hoc test, was used to test for significance. Statistical  
 59 significance was defined as  $p < 0.05$  (\*),  $p < 0.01$  (\*\*), or  $p < 0.0001$  (\*\*\*\*). (d) Following infection, *V. cholerae*  
 60 (green), DNA (blue), and F-actin (red) were visualized by fluorescence microscopy. Scale bar, 10  $\mu$ m.

61

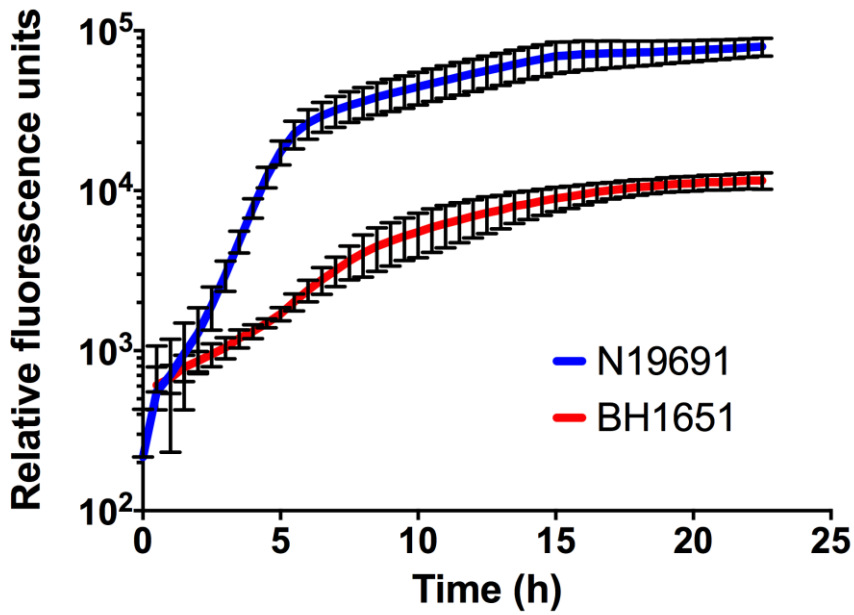

62

63 **Figure S7| Growth curves of *V. cholerae* wild type and BH1651 mutant.** Bacterial cultures were grown at  
64 200rpm, 37 °C and GFP fluorescence was measured every 30 minutes for 20 hours. Results are means ± s.e.m. of  
65 three independent experiments.

---

66

## 67 SUPPORTING TABLES

68 Table S1 | *V. cholerae* strains used in this study.

| Strain | Description                                                                                                    | Source or reference  |
|--------|----------------------------------------------------------------------------------------------------------------|----------------------|
| N16961 | Wild-type; O1 biovar El Tor.                                                                                   | Heidelberg et al.(1) |
| NP5001 | N16961 carrying promoterless pRW50-oriT plasmid; Tet <sup>R</sup> .                                            | This study           |
| NP5002 | N16961 carrying pRW50-oriT plasmid containing the upstream region of <i>toxT</i> promoter; Tet <sup>R</sup> .  | This study           |
| NP5003 | N16961 carrying pRW50-oriT plasmid containing the upstream region of <i>ctxAB</i> promoter; Tet <sup>R</sup> . | This study           |
| NP5004 | N16961 carrying pRW50-oriT plasmid containing the upstream region of <i>tcpA</i> promoter; Tet <sup>R</sup> .  | This study           |
| NP5005 | N16961 carrying pRW50-oriT plasmid containing the upstream region of <i>aphA</i> promoter; Tet <sup>R</sup> .  | This study           |
| NP5006 | N16961 carrying pRW50-oriT plasmid containing the upstream region of <i>flaA</i> promoter; Tet <sup>R</sup> .  | This study           |
| NP5007 | N16961 carrying pRW50-oriT plasmid containing the upstream region of <i>flaE</i> promoter; Tet <sup>R</sup> .  | This study           |
| NPMW1  | N16961 carrying pMW- <i>gfp</i> plasmid; Spect <sup>R</sup> .                                                  | Ritchie et al.(2)    |
| E7946  | Wild type <i>V. cholerae</i> El Tor O1 Ogawa                                                                   | A. Camilli lab       |
| AC2764 | <i>tcpA</i> deletion mutant of E7946                                                                           | A. Camilli lab       |
| BH1651 | <i>luxO</i> <sup>D47E</sup>                                                                                    | Ng et al.(30)        |



70 **Table S2** Primers used in this study, with restriction sites underlined.

| Primer   | Sequence (5'-3')                                  |
|----------|---------------------------------------------------|
| pRW50 F  | GTTCTCGCAAGGACGAGAATTTC                           |
| pRW50 R  | AATCTTCACGCTTGAGATAC                              |
| aphApF1  | TGCAGAATTCCTGGTTAACAAATCGCTAAATGTCAG              |
| aphApR1  | ATTC <u>AAGCTT</u> GTGTGGTAATGACATGTCTTCAATC      |
| toxTpF1  | TGTAGAATTCGATAAGATAACAGCCATATTCGTGG               |
| toxTpR1  | GATC <u>AAGCTT</u> TCCCAATCATTGCGTTCTACTC         |
| ctxABpF1 | GCTTGAATTCCTGTGGGTAGAAGTGAAACGG                   |
| ctxABpR1 | TCATA <u>AAGCTT</u> TATCTTTACCATATAATGCTCCCTTTG   |
| tcpApF1  | CTTAGAATTCGGTCTTATCATGAGCCGCC                     |
| tcpApR1  | TGATA <u>AAGCTT</u> TGCATATTTATATAACTCCACCATTTGTG |
| flaApF1  | ATCTGAATTCGTCAGCGGCAAATGGATTG                     |
| flaApR1  | GTCA <u>AAGCTT</u> CATAGTTTGCTCTCCTATCGAGTTC      |
| flaEpF1  | ATCTGAATTCGATCACGGCCTACTGTTTATTG                  |
| flaEpR1  | GTCA <u>AAGCTT</u> ATTTACCGTCATGGCCATGG           |

72 **SUPPORTING MATERIALS AND METHODS**73 **Polymer synthesis and characterization.**

74 **Materials:** *N*-(3-aminopropyl)methacrylamide hydrochloride (APMAm), *N*-[3-  
75 (dimethylamino)propyl]methacrylamide (DMAPMAm), 2,2'-azobis(2-methylpropionitrile)  
76 (AIBN) and Dulbecco's Modified Eagle's Medium (DMEM) were purchased from Sigma-  
77 Aldrich. 4,4'-azobis(4-cyanovaleric acid) (ACVA) and 2-mercaptoethanol were bought from Alfa  
78 Aesar. Polyethylene glycol standards were purchased from Agilent Technologies. All other  
79 chemicals were purchased from Fisher Scientific and VWR and were used without further  
80 purification. Polymers were synthesized by radical polymerisation as described below.

81 **Instrumentation:** Polymers were characterized by Nuclear Magnetic Resonance (NMR) and Gel  
82 Permeation Chromatography (GPC). NMR spectra were recorded on a Bruker Avance III  
83 spectrometer operating at 300 MHz and fitted with a 5 mm BBFO probe. Chemical shifts (Figure  
84 S1 and Figure S2) are reported in ppm ( $\delta$ ) referenced to the corresponding solvent signals:  
85 DMSO-*d*6 ( $\delta = 2.50$ ) and D<sub>2</sub>O ( $\delta = 4.79$ ). GPC was recorded on a Shimadzu Prominence LC-  
86 20A, fitted with Shodex Asaphipak GF-510 HQ (300 × 7.5 mm, 5  $\mu$ m) and GF-310 HQ (300 ×  
87 7.5 mm, 5  $\mu$ m) columns in series, and equipped with a Thermo Fisher Refractomax 521 detector.  
88 GPC analysis was carried out using 100 mM acetate buffer at pH 2.9 as eluent at 40 °C and a  
89 flow rate of 0.6 mL·min<sup>-1</sup>. Molecular weights were calculated based on a standard calibration  
90 method using polyethylene glycol.

91 **Synthesis and characterization of *p*(APMAm) (PI):** *N*-(3-aminopropyl)methacrylamide  
92 (APMAm) hydrochloride (505.0 mg, 2.770 mmol), 4,4'-azobis(4-cyanovaleric acid) (ACVA)  
93 (12.4 mg, 0.033 mmol) and 2-mercaptoethanol (1.0  $\mu$ L, 0.014 mmol) were dissolved in MilliQ  
94 water (2.2 mL). This solution was degassed under argon for 10 minutes and then heated at 70 °C  
95 under stirring for 17 hours. After this time, the reaction flask was opened to the air and the crude  
96 was precipitated three times into diethyl ether (50 mL). The precipitate was freeze-dried and a  
97 crystalline white solid was obtained (70.0 mg, 14% yield). <sup>1</sup>H-NMR (300 MHz, D<sub>2</sub>O)  $\delta$  (ppm):  
98 3.11 (br, 3H, CH<sub>3</sub> backbone), 2.93 (br t, *J* = 7.0 Hz, 2H, CO-NH-CH<sub>2</sub>), 1.78 (br, 2H, -CH<sub>2</sub>-NH<sub>2</sub>),  
99 1.63 (br, 2H, -CH<sub>2</sub>-CH<sub>2</sub>-NH<sub>2</sub>), 0.98 (br, 1H, CH<sub>2</sub> backbone), 0.83 (br, 1H, CH<sub>2</sub> backbone). Mn (GPC)  
100 46997, *D*<sub>M</sub> (GPC) 1.16.

101 **Synthesis and characterization of p(DMAPMAm) (P2):** *N*-[3-  
102 (dimethylamino)propyl]methacrylamide (DMAPMAm) (2.2 mL, 12.025 mmol), 2,2'-azobis(2-  
103 methylpropionitrile) (AIBN) (19.6 mg, 0.117 mmol) and 2-mercaptoethanol (4.0  $\mu$ L, 0.056  
104 mmol) were dissolved in toluene (9.5 mL). This solution was degassed under argon for 10  
105 minutes and then heated at 70 °C under stirring for 18 hours. After this time, the reaction flask  
106 was opened to the air and the crude was precipitated twice: first into diethyl ether (200 mL) and  
107 then into a diethyl ether/ hexane mixture (1:1) (100 mL). The precipitate was freeze-dried and a  
108 crystalline white solid was obtained (1.66 g, 87% yield). <sup>1</sup>H-NMR (300 MHz, DMSO-*d*<sub>6</sub>)  $\delta$   
109 (ppm): 7.51 (br, 1H, CO-NH), 2.96 (br, 2H, CO-NH-CH<sub>2</sub>), 2.19 (br, 5H, CH<sub>2</sub>-N-(CH<sub>3</sub>)<sub>2</sub> + CH<sub>3</sub>  
110 backbone), 2.11 (br, 6H, N-(CH<sub>3</sub>)<sub>2</sub>), 1.50 (br, 2H, CH<sub>2</sub>-CH<sub>2</sub>-N), 0.78 (br, 2H, CH<sub>2</sub> backbone). Mn  
111 (buffer GPC) 46331,  $D_M$  (buffer GPC) 1.14.

112 **Bacterial strains and culture conditions.** *Vibrio cholerae* strains used in this study (**Table S1**)  
113 were derived from the El Tor strain N16961 used as parental strain. Strains were propagated at 37  
114 °C in Luria-Bertani (LB) broth supplemented with 50  $\mu$ g/ $\mu$ L spectinomycin, 30  $\mu$ g/ $\mu$ L kanamycin  
115 or 10  $\mu$ g/ $\mu$ L tetracycline where selection was required. Plasmids were introduced into *V. cholerae*  
116 by conjugation, as previously described (3). Briefly, aliquots of overnight cultures of *V. cholerae*  
117 N16961, *E. coli* DH5a carrying the desired plasmid (donor) and an *E. coli* SM10 helper strain  
118 carrying pRK2013 were mixed at a volumetric ratio of 1:2:2 and spotted onto brain-heart infusion  
119 (BHI) agar. Following overnight incubation, spots of bacterial growth were dislodged and  
120 suspended in 3 mL of PBS. 100  $\mu$ L of bacterial suspension were plated onto M9 media  
121 containing 50  $\mu$ g/ $\mu$ L of spectinomycin. Resulting colonies were checked by PCR and sequencing  
122 in the case of pRW50-oriT constructs, and also by screening for green fluorescence in the case of  
123 pMW-*gfp* transformants.

124 **Plasmid construction.** Primers used for cloning and sequencing the constructs used in this study  
125 are listed in **Table S2** and were designed based on the sequence of *V. cholerae* N16961 (1).  
126 Primers were paired as appropriate to amplify upstream regions of *toxT*, *ctxAB*, *tcpA*, *aphA*, *flaA*  
127 and *flaE* (**Figure 4** and **Figure S5**). Amplified DNA was digested using EcoR1 and HindIII, and  
128 ligated into digested pRW50-oriT vector (gift from the Grainger lab). The vector is a derivative  
129 of pRW50 (4), which has been modified by inserting the *oriT* sequence from the vector pRK2

130 (5). The resulting reporter constructs were used to transform *V. cholerae* and the resulting strains  
131 are listed in **Table S1**.

132 **Imaging and sizing of bacterial clusters.** An overnight culture of *V. cholerae* was diluted to an  
133 OD<sub>600</sub> of 1.0 in DMEM without phenol red and polymers were added to final concentrations  
134 ranging from 0-0.5 mg/mL (**Figure 1** and **Figure S3**). For imaging of clusters, aliquots were  
135 taken after 15 and 60 min of incubation and mounted with ProLong® Antifade Gold solution  
136 (LifeTechnologies). Cured samples were visualized using a Nikon-Eclipse TE2000-U microscope  
137 and Plan Apo 60x/ 1.40 NA oil DIC objective (Nikon) and captured with QICAM Fast1394  
138 camera (Q imaging). Representative images were taken using Nikon NIS-Elements software and  
139 prepared with ImageJ and Corel Draw X5 software. The size distribution of bacterial clusters was  
140 determined using a Mastersizer 3000 (Malvern) through a period of time of 10 minutes following  
141 addition of polymer. P1 was added at  $5 \times 10^{-2}$  mg/mL and  $5 \times 10^{-1}$  mg/mL with stirring and  
142 recorded particle diffraction was plotted as percentage of the particles with a diameter larger than  
143 2  $\mu$ m. The cutoff size for clusters versus individual bacteria was determined on the median  
144 diameter of particles from a sample containing no polymer (2  $\mu$ m).

145 **Motility assay.** Motility of *V. cholerae* was assessed as previously described (30). Briefly,  
146 overnight cultures of *V. cholerae* were diluted to an OD<sub>600</sub> of 1.0 and then, clustered with either  
147 P1 or P2. An aliquot of 1 uL from clustered bacteria was placed into soft agar LB plates (0.4%  
148 agar) and incubated overnight at room temperature. For the high salt control, clustered bacteria  
149 were treated with 1 mL of high-salt PBS (200 mM NaCl), when the solution turned cloudy an  
150 aliquot of 1 uL was placed into soft agar plates and incubated overnight at room temperature.  
151 After incubation, pictures of the plates were taken.

152  
153 **Determination of bacterial growth and membrane integrity.** Overnight cultures of GFP-  
154 expressing *V. cholerae* were diluted into DMEM containing 50  $\mu$ g/ $\mu$ L of spectinomycin to an  
155 OD<sub>600</sub> of 0.02 as starting density. Polymers aliquots were added to give the desired final  
156 concentrations (**Figure 2**) in 200  $\mu$ L culture using a 96-well plate. The plate was covered with a  
157 BEM-1 breathe easy gas permeable membrane to avoid evaporation and incubated at 37 °C with  
158 constant shaking at 200 rpm. GFP fluorescence was recorded every 30 minutes over 24 hours  
159 using a FLUOstar Omega plate reader. Membrane integrity of *V. cholerae* cells was assessed by

160 fluorescent-activated cell sorting (FACS) using the LIVE/DEAD *BacLight*<sup>TM</sup> kit  
161 (LifeTechnologies). Overnight cultures were diluted to an OD<sub>600</sub> of 1.0 in 1 mL of DMEM  
162 without phenol red, and containing polymers at final concentrations ranging from 0 to 0.5 mg/mL  
163 and incubated for 20 hours (**Figure 2**). Following incubation, samples were stained according to  
164 the manufacturer's instructions. Readings were taken on an Attune Flow Cytometer, at a flow of  
165 100  $\mu$ L/min counting up to 10,000 events. Samples containing no polymer were used as "LIVE"  
166 controls. In the case of "DEAD" controls, DMEM was replaced by 70% 2-propanol and  
167 incubated for 1 h. Prior to staining, 2-propanol was removed and cells were washed once and  
168 resuspended in fresh DMEM to carry out the staining procedure.

169 **Quantification of biofilm formation (Figure 3a).** The amount of biofilm was determined by  
170 crystal violet staining, as previously described (6). Briefly, *V. cholerae* was exposed to different  
171 concentrations of polymers and incubated overnight at 37°C with shaking in a 96-well plate.  
172 Cultures were removed and biofilm was rinsed with PBS and stained with 200  $\mu$ L of 1% crystal  
173 violet solution in water. After 30 minutes, the crystal violet solution was removed and the well  
174 was rinsed again with PBS. In order to detach the dye, 200  $\mu$ L of 95% ethanol was added to each  
175 well. The amount of biofilm was determined by measuring at a wavelength 595 nm.

176 **Imaging of biofilm formation and extracellular DNA quantification. (Figure 3b-d).** Biofilms  
177 of GFP-*V. cholerae* were grown for 20 hours at 37°C in 96-well glass-bottom plates containing  
178 bacteria at an initial OD<sub>600</sub> of 0.2 in DMEM only, or DMEM containing 0.05 mg/mL P1, or 0.05  
179 mg/mL P2. Following incubation, plates were rinsed with PBS, samples fixed with 4%  
180 formaldehyde in PBS for 15 minutes and then washed with PBS. DNA was stained with 10  
181  $\mu$ g/mL Hoechst in PBS for 10 minutes. Samples were imaged using a Zeiss Axio Observer.Z1  
182 microscope, Zeiss 40x/1.4 Plan Apochromat,objective, ORCA-Flash4.0 camera (Hamamatsu)  
183 and ZEN 2.0.0.10 software, Images were processed using Image J and Corel Draw X5.  
184 Extracellular DNA was determined from pictures take under a Nikon TE2000-U microscope  
185 using a 100x Plan Apo objective (Nikon) and captured with Digital Sight DS-Qi1MC camera  
186 (Nikon). From each picture, the intensity of pixels was measured from the blue channel using  
187 ImageJ.

188 **Transcriptional assays:  $\beta$ -galactosidase activity.** *V. cholerae* reporter strains were assayed for  $\beta$ -  
189 galactosidase activity as previously described (7). Briefly, *V. cholerae* cultures were diluted to an

190 OD<sub>600</sub> of 0.2 and incubated for 7 hours at 37 °C in DMEM containing polymers. Separate aliquots  
191 were taken and used to measure β-galactosidase activity, or washed with PBS and resuspended in  
192 high salt solution to disrupt clusters prior to measuring OD<sub>600</sub>. Transcriptional activity (in Miller  
193 Units) was calculated as previously described (7).

194 **Cytotoxicity in Caco-2 cells.** Overnight cultures of the GFP-expressing *V. cholerae* were grown  
195 in LB at 37 °C. Prior to infection, cultures were adjusted to an MOI of 10 and incubated for 1  
196 hour in 1 mL of DMEM without phenol red and polymers as indicated, at 30 °C. Caco-2 cells  
197 were washed with PBS to remove media containing antibiotics and infections were started by  
198 transferring the solution of bacteria into the wells. Plates were centrifuged at 1000x g for 5 min at  
199 20 °C to synchronize the infections. After an incubation of 7 hours at 37 °C under 5% CO<sub>2</sub>,  
200 supernatants were used to measure lactate dehydrogenase (LDH) activity using LDH Cytotoxicity  
201 Detection Kit (Takara Clontech) according to the manufacturer's instructions. The data was  
202 expressed as percentage of cytotoxicity, normalized to untreated cells (0%) and 0.1% Triton X-  
203 100 lysed cells (100% lysis) and was calculated according to the formula: % cytotoxicity=100 x  
204 [(OD<sub>490</sub> for experimental release - OD<sub>490</sub> for spontaneous release)/ [OD<sub>490</sub> for maximum  
205 release– OD<sub>490</sub> for spontaneous release]].

206 **Zebrafish care and maintenance.** Zebrafish (*Danio rerio* wild type strain AB) were kept in a  
207 recirculating tank system at the University of Birmingham Aquatic Facility. Zebrafish were kept  
208 under a 14h-10h light-dark cycle with water temperature maintained at 28 °C. Zebrafish care,  
209 breeding and experiments were performed in accordance with the Animal Scientific Procedures  
210 Act 1986, under Home Office Project License 40/3681. After collection of eggs, larvae were kept  
211 in a diurnal incubator under a 14h-10h light-dark cycle with the temperature maintained at 33 °C.  
212 Eggs were maintained at 40 eggs per 50 ml in E3 media plus 0.00003% methylene blue for 8 h  
213 and E3 media plus 26.6 µg/ml 1-phenyl-2-thiourea (PTU) to inhibit melanization. The fish line  
214 used was wild-type AB zebrafish. All zebrafish care and husbandry procedures were performed  
215 as described previously (8).

216 **Infection of zebrafish embryos with *V. cholerae*.** Prior to infection, 10<sup>6</sup> and 10<sup>7</sup> CFU/mL of *V.*  
217 *cholerae* were incubated in 3 mL of E3 medium containing polymers as indicated in the figure  
218 legends. After 1 hour of incubation to ensure cluster formation, zebrafish embryos (5 d.p.f) were  
219 placed into cluster solutions and incubated with rotation at 25 °C for 6 hours. Embryos were

220 euthanised with an overdose of Tricaine-S (1600 µg/mL) and homogenised by washing the  
221 embryos with PBS and incubating them in 1% Triton X-100 for 30 minutes. Lysates were passed  
222 several times through a needle to homogenize and 100 µL of the resulting solution, as well as  
223 serial dilutions, were plated onto TCBS agar and colonies counted following overnight  
224 incubation at 37 °C.

225 **Imaging of infected Caco-2 cells and zebrafish embryos.** In the case of samples for imaging,  
226 Caco-2 cells were seeded onto sterilized glass cover slips inserted into wells of the plate. Imaging  
227 of infected Caco-2 cells was done by fixing the samples with 4% formaldehyde in PBS for 15  
228 minutes and then washing with PBS. Cells were permeabilized by adding 0.1% Triton X-100 in  
229 PBS and incubation at room temperature for 5 minutes, and washed three times with PBS.  
230 Samples were stained with 10 µg/mL Hoechst and 66 ng/mL of rhodamine-phalloidin in the dark  
231 for 10 minutes to visualize DNA and F-actin, respectively. Staining was followed by three  
232 washing steps with PBS (5 minutes each). Samples were mounted using antifade gold mounting  
233 solution (Life-Technologies) and cured overnight at 22 °C prior to visualization. Visualization of  
234 zebrafish embryos was done by directly mounting the embryos in 0.4% low melting point  
235 agarose containing 160 µg/mL of Tricaine-S. Samples were viewed under a Zeiss Axio  
236 Observer.Z1 microscope with 63x/1.4 Plan Apochromat objective for the Caco-2 infection and  
237 20x/0.8 Plan Apochromat objective in the case of the larvae. Images were processed using  
238 ImageJ software.

239

240 **Supporting References**

- 241 1. Heidelberg JF, *et al.* (2000) DNA sequence of both chromosomes of the cholera pathogen  
242 *Vibrio cholerae*. *Nature* 406(6795):477-483.
- 243 2. Ritchie JM, *et al.* (2012) Inflammation and disintegration of intestinal villi in an  
244 experimental model for *Vibrio parahaemolyticus*-induced diarrhea. *PLoS pathogens*  
245 8(3):e1002593.
- 246 3. Goldberg JB & Ohman DE (1984) Cloning and expression in *Pseudomonas aeruginosa* of  
247 a gene involved in the production of alginate. *Journal of bacteriology* 158(3):1115-1121.
- 248 4. Lodge J, Williams R, Bell A, Chan B, & Busby S (1990) Comparison of promoter  
249 activities in *Escherichia coli* and *Pseudomonas aeruginosa*: use of a new broad-host-range  
250 promoter-probe plasmid. *FEMS microbiology letters* 55(1-2):221-225.
- 251 5. Figurski DH, Pohlman RF, Bechhofer DH, Prince AS, & Kelton CA (1982) Broad host  
252 range plasmid RK2 encodes multiple kil genes potentially lethal to *Escherichia coli* host  
253 cells. *Proceedings of the National Academy of Sciences of the United States of America*  
254 79(6):1935-1939.
- 255 6. O'Toole GA (2011) Microtiter dish biofilm formation assay. *Journal of visualized*  
256 *experiments : JoVE* (47).
- 257 7. Bell AI, Gaston KL, Cole JA, & Busby SJ (1989) Cloning of binding sequences for the  
258 *Escherichia coli* transcription activators, FNR and CRP: location of bases involved in  
259 discrimination between FNR and CRP. *Nucleic acids research* 17(10):3865-3874.
- 260 8. Westerfield M (2000) *The Zebrafish Book*. (University Press Oregon, Eugene, OR).

261
